# Supplementary material
Source: PubMed Central journal article supplement (PMC5839115)
Supplement: NIHMS935704-supplement-Supplemental.pdf [file NIHMS935704-supplement-Supplemental.pdf]

## **ESM Methods**

**Blood collection procedures.** Serum was obtained using the standardized operation procedure (SOP) adopted by TrialNet in all of its centres. In brief, blood is drawn with a 21-gauge winged-infusion set, by a licensed phlebotomist. Blood is collected in a pre-labelled a 2.5 mL serum separator tube, which is inverted 8-10 times, then allowed to clot for 30 minutes at room temperature. The serum is isolated, within the hour, by centrifugation at 1,000-1,300 g for 10 minutes in a swinging bucket rotor. The liquid phase is collected and aliquoted into pre-labelled 1.8 mL cryovials and stored at  $-20^{\circ}$ / $-70^{\circ}$  C until distribution.

**Control miRNAs and assessment of haemolysis.** Preliminary studies of the local cohort utilized Exiqon V2.0 miRNA Ready-to-use PCR Human Panel II V2.M/R - miRBase v.13; these include two plates with an inter-plate calibrator (UniSP6), cellular positive controls (SNORD38B, SNORD49A, U6), an extraction control (UniSP3), and negative control wells. In our custom 93 miRNA panel, we preserved UniSp6 and UniSp3 but excluded cellular positive controls since we studied acellular samples. We assessed haemolysis comparing miR-451a (highly expressed in red blood cells) to miR-23a-3p levels (unaffected by haemolysis) [1]. Delta  $C_t$  (miR-23a-3p - miR-451a) values  $>5$  indicate possible erythrocyte miRNA contamination, and values  $>7-8$  indicate high risk of haemolysis. None of the samples studied (190 local cohort and 300 TrialNet samples) had score values greater than 7. The delta  $C_t$  scores for all samples studied (control and TrialNet) did not significantly differ (mean  $\pm$  SD:  $5.32 \pm 1.47$  and  $4.48 \pm 1.51$ ).

## **ESM Results**

### **Sample age does not influence serum miRNA detection but only a small proportion of miRNAs are detected in serum in most individuals.**

For initial assay validation, we studied serum samples from 40 healthy subjects (20 females and 20 males, mean age  $24 \pm \text{SD } 4.7$  years, range 17-32) who had no family history of T1D and tested negative for T1D-associated autoantibodies (not shown). All provided written informed consent under protocol 1995-119, which was approved by the Institutional Review Board of the University of Miami. These samples were used to investigate whether age of the serum samples impacted detection of circulating miRNAs. We used the standard Exiqon panel consisting of primers for 745 miRNAs for the analysis of the 40 control samples.

Importantly, only 36% (mean  $274.8 \pm \text{SD } 61.5$ ) of the 745 miRNAs were detected in serum at the more conservative  $\leq 35$   $C_t$  threshold. There was individual variability and only 20% (150/745) and 8% (60/745) of the miRNAs were detected in more than 80% of the samples using the 38 and 35  $C_t$  cut-offs, respectively. Therefore, we designed a custom panel that allowed measuring levels of 93 miRNAs (**ESM Table 1**) inclusive of (and/or):

(a) those most commonly expressed in serum;

(b) those with preliminary suggestions of association with T1D and/or islet autoimmunity from the literature and exploratory analyses of T1D patients/relatives from our institution (data not shown): besides the control subjects, this local cohort included 50 patients with T1D, 50 siblings with autoantibodies and 50 siblings without autoantibodies (the data set included 21 family trios composed of a patient and two siblings, one with and the other without autoantibodies); the T1D patients had variable disease duration at the time of the study, ranging from 0.1 to 33 years, yet most (47/50) were still positive for at least 1 autoantibody in the same sample tested for miRNAs; 36 of the T1D patients had  $\geq 2$  autoantibodies. Among the 50

autoantibody-positive relatives, 15 had a single autoantibody and 35 had multiple autoantibodies. We used the data from this pilot study to seek preliminary evidence of associations, estimate variance to appropriately power the study of the TrialNet cohort, and to identify the miRNAs that were more commonly detected in serum across this collection of 190 samples. Thus, selection of miRNAs in the custom panel is representative of miRNAs commonly detected in healthy subjects but also preliminarily found associated with T1D and/or autoantibodies in patients and their siblings. This entire cohort, as shown below in **ESM Table 2**, also included very young children and thus comprises the age range represented in the TrialNet cohort. Of note, no subjects in the local cohorts overlapped with the TrialNet cohort.

(c) those with literature associations with other autoimmune diseases, insulin resistance, hyperglycaemia and beta cell function. Six miRNAs were selected as internal controls.

For both control and TrialNet samples there was no correlation of the global mean of  $C_t$  values and of the number of miRNAs detected with the RNA concentration (data not shown). Among the TrialNet subjects, an individual on average expressed 62% of the 93 miRNAs tested with the custom panel (mean  $n = 58 \pm SD 5$ ) at the  $<38 C_t$  threshold. Both in the control (**ESM Fig. 1A-B**) and TrialNet (**ESM Fig. 1C-D**) data there was no correlation of the age of the samples with number of miRNAs detected and with the global mean of  $C_t$  values.

## References

- [1] Blondal T, Jensby Nielsen S, Baker A, et al. (2013) Assessing sample and miRNA profile quality in serum and plasma or other biofluids. *Methods (San Diego, Calif)* 59: S1-6

## ESM TABLES

ESM Table 1. Custom panel of 93 miRNAs used for TrialNet samples.

| microRNA Name   | Primer                   | LNA™ PCR primer set, Product No |
|-----------------|--------------------------|---------------------------------|
| hsa-miR-103a-3p | AGCAGCAUUGUACAGGGCUAUGA  | 204063                          |
| hsa-miR-106a-5p | AAAAGUGCUUACAGUGCAGGUAG  | 204563                          |
| hsa-miR-124-3p  | UAAGGCACGCGGUGAAUGCC     | 204319                          |
| hsa-miR-126-3p  | UCGUACCGUGAGUAAUAAUGCG   | 204227                          |
| hsa-miR-141-3p  | UAACACUGUCUGGUAAAGAUGG   | 204504                          |
| hsa-miR-143-3p  | UGAGAUGAAGCACUGUAGCUC    | 204190                          |
| hsa-miR-146a-5p | UGAGAACUGAAUCCAUGGGUU    | 204688                          |
| hsa-miR-150-5p  | UCUCCCAACCCUUGUACCAGUG   | 204660                          |
| hsa-miR-155-5p  | UUA AUGCUAAUCGUGAUAGGGGU | 204308                          |
| hsa-miR-15a-5p  | UAGCAGCACAUAAUGGUUUGUG   | 204066                          |
| hsa-miR-17-5p   | CAAAGUGCUUACAGUGCAGGUAG  | 204771                          |
| hsa-miR-192-5p  | CUGACCUAUGAAUUGACAGCC    | 204099                          |
| hsa-miR-200c-3p | UAAUACUGCCGGGUAUGAUGGA   | 204482                          |
| hsa-miR-205-5p  | UCCUUCAUUCCACCGGAGUCUG   | 204487                          |
| hsa-miR-20a-5p  | UAAAGUGCUUAUAGUGCAGGUAG  | 204292                          |
| hsa-miR-21-3p   | CAACACCAGUCGAUGGGCUGU    | 204302                          |
| hsa-miR-214-3p  | ACAGCAGGCACAGACAGGCAGU   | 204510                          |
| hsa-miR-21-5p   | UAGCUUAUCAGACUGAUGUUGA   | 204230                          |
| hsa-miR-221-3p  | AGCUACAUUGUCUGCUGGGUUUC  | 204532                          |
| hsa-miR-223-3p  | UGUCAGUUUGUCAAAUACCCCA   | 204256                          |
| hsa-miR-224-5p  | CAAGUCACUAGUGGUUCCGUU    | 204641                          |
| hsa-miR-23a-3p  | AUCACAUUGCCAGGGAUUUC     | 204772                          |
| hsa-miR-23b-3p  | AUCACAUUGCCAGGGAUUACC    | 204790                          |
| hsa-miR-28-3p   | CACUAGAUUGUGAGCUCCUGGA   | 204119                          |
| hsa-miR-29b-3p  | UAGCACCAUUUGAAAUCAGUGUU  | 204679                          |
| hsa-miR-29c-3p  | UAGCACCAUUUGAAAUCGGUUA   | 204729                          |
| hsa-miR-30b-3p  | CUGGGAGGUGGAUGUUUACUUC   | 205933                          |
| hsa-miR-30d-5p  | UGUAAACAUCCCGACUGGAAG    | 204757                          |
| hsa-miR-320a    | AAAAGCUGGGUUGAGAGGGCGA   | 204154                          |
| hsa-miR-320b    | AAAAGCUGGGUUGAGAGGGCAA   | 205921                          |
| hsa-miR-326     | CCUCUGGGCCCUUCCUCCAG     | 204512                          |

ESM Table 1. Custom panel of 93 miRNAs used for TrialNet samples, continued.

| microRNA Name   | Primer                  | LNA™ PCR primer set, Product No |
|-----------------|-------------------------|---------------------------------|
| hsa-miR-342-3p  | UCUCACACAGAAAUCGCACCCGU | 205625                          |
| hsa-miR-346     | UGUCUGCCCGCAUGCCUGCCUCU | 204538                          |
| hsa-miR-34a-5p  | UGGCAGUGUCUUAGCUGGUUGU  | 204486                          |
| hsa-miR-412     | ACUUCACCUGGUCCACUAGCCGU | 204460                          |
| hsa-miR-423-5p  | UGAGGGGCAGAGAGCGAGACUUU | 205624                          |
| hsa-miR-485-3p  | GUCAUACACGGCUCUCCUCUCU  | 205924                          |
| hsa-miR-491-5p  | AGUGGGGAACCCUUCCAUGAGG  | 204695                          |
| hsa-miR-523-3p  | GAACGCGCUUCCCUAUAGAGGGU | 204452                          |
| hsa-miR-542-5p  | UCGGGGAUCAUCAUGUCACGAGA | 204198                          |
| hsa-miR-548a-3p | CAAACUGGCAAUUACUUUUGC   | 205650                          |
| hsa-miR-577     | UAGAUAAAAUUAUUGGUACCUG  | 204666                          |
| hsa-miR-584-5p  | UUAUGGUUUGCCUGGGACUGAG  | 204568                          |
| hsa-miR-593-3p  | UGUCUCUGCUGGGGUUUCU     | 204083                          |
| hsa-miR-595     | GAAGUGUGCCGUGGUGUGUCU   | 204070                          |
| hsa-miR-671-5p  | AGGAAGCCCUGGAGGGGCUGGAG | 205649                          |
| hsa-miR-760     | CGGCUCUGGGUCUGUGGGGA    | 204549                          |
| hsa-miR-922     | GCAGCAGAGAAUAGGACUACGUC | 204478                          |
| hsa-miR-92a-3p  | UAUUGCACUUGUCCCGGCCUGU  | 204258                          |
| hsa-miR-93-3p   | ACUGCUGAGCUAGCACUCCCG   | 204470                          |
| hsa-miR-93-5p   | CAAAGUGCUGUUCGUGCAGGUAG | 204715                          |
| hsa-miR-96-5p   | UUUGGCACUAGCACAUUUUUGCU | 204417                          |
| hsa-miR-148a-3p | UCAGUGCACUACAGAACUUUGU  | 205867                          |
| hsa-miR-152     | UCAGUGCAUGACAGAACUUGG   | 204294                          |
| hsa-miR-181a-5p | AACAUUCAACGCUGUCGGUGAGU | 204566                          |
| hsa-miR-200a-3p | UAACACUGUCUGGUAACGAUGU  | 204707                          |
| hsa-miR-24-3p   | UGGCUCAGUUCAGCAGGAACAG  | 204260                          |
| hsa-miR-25-3p   | CAUUGCACUUGUCUCGGUCUGA  | 204361                          |
| hsa-miR-26a-5p  | UUCAAGUAAUCCAGGAUAGGCU  | 205905                          |
| hsa-miR-27a-3p  | UUCACAGUGGCUAAGUCCGC    | 204764                          |
| hsa-miR-27b-3p  | UUCACAGUGGCUAAGUUCUGC   | 205915                          |
| hsa-miR-29a-3p  | UAGCACCAUCUGAAAUCGGUUA  | 204698                          |

ESM Table 1. Custom panel of 93 miRNAs used for TrialNet samples, continued.

| microRNA Name   | Primer                      | LNA™ PCR primer set, Product No |
|-----------------|-----------------------------|---------------------------------|
| hsa-let-7g-5p   | UGAGGUAGUAGUUUGUACAGUU      | 204565                          |
| hsa-miR-1183    | CACUGUAGGUGAUGGUGAGAGUGGGCA | 204176                          |
| hsa-miR-122-5p  | UGGAGUGUGACAAUGGUGUUUG      | 205664                          |
| hsa-miR-134     | UGUGACUGGUUGACCAGAGGGG      | 205896                          |
| hsa-miR-141-5p  | CAUCUCCAGUACAGUGUUGGA       | 204500                          |
| hsa-miR-142-3p  | UGUAGUGUUUCCUACUUUAUGGA     | 204291                          |
| hsa-miR-142-5p  | CAUAAAGUAGAAAGCACUACU       | 204722                          |
| hsa-miR-16-5p   | UAGCAGCACGUAAAUAUUGGCG      | 205702                          |
| hsa-miR-183-5p  | UAUGGCACUGGUAGAAUUCACU      | 204652                          |
| hsa-miR-185-3p  | AGGGGCUGGCUUUCCUCUGGUC      | 205710                          |
| hsa-miR-191-5p  | CAACGGAAUCCCAAAGCAGCUG      | 204306                          |
| hsa-miR-195-5p  | UAGCAGCACAGAAUAUUGGC        | 205869                          |
| hsa-miR-19a-3p  | UGUGCAAUCUAUGCAAACUGA       | 205862                          |
| hsa-miR-202-3p  | AGAGGUUAUAGGGCAUGGGAA       | 204101                          |
| hsa-miR-210     | CUGUGCGUGUGACAGCGGCUGA      | 204333                          |
| hsa-miR-222-3p  | AGCUACAUCUGGCUACUGGGU       | 204551                          |
| hsa-miR-31-5p   | AGGCAAGAUGCUGGCAUAGCU       | 204236                          |
| hsa-miR-375     | UUUGUUCGUUCGGCUCGCGUGA      | 204362                          |
| hsa-miR-376a-3p | AUCAUAGAGGAAAAUCCACGU       | 204508                          |
| hsa-miR-424-5p  | CAGCAGCAAUUCAUGUUUUGAA      | 204736                          |
| hsa-miR-451a    | AAACCGUUACCAUUACUGAGUU      | 204734                          |
| hsa-miR-452-3p  | CUCAUCUGCAAAGAAGUAAGUG      | 204201                          |
| hsa-miR-452-5p  | AACUGUUUGCAGAGGAAACUGA      | 204301                          |
| hsa-miR-490-3p  | CAACCUGGAGGACUCCAUGCUG      | 205875                          |
| hsa-miR-509-3p  | UGAUUGGUACGUCUGUGGGUAG      | 204458                          |
| hsa-miR-524-5p  | CUACAAAGGGAAGCACUUUCUC      | 204135                          |
| hsa-miR-619     | GACCUGGACAUGUUUGUGCCCAGU    | 204120                          |
| hsa-miR-624-3p  | CACAAGGUUAUUGGUUUACCU       | 205684                          |
| hsa-miR-675-5p  | UGGUGCGGAGAGGGCCCACAGUG     | 205687                          |
| hsa-miR-934     | UGUCUACUACUGGAGACACUGG      | 205694                          |
| hsa-miR-9-5p    | UCUUUGGUUAUCUAGCUGUAUGA     | 204513                          |

**ESM Table 2. Age information for the cohorts examined.**

| <b>Cohorts</b>              | <b>Mean <math>\pm</math> SD, range, in years</b> |
|-----------------------------|--------------------------------------------------|
| Local Control (n=40)        | 24.9 $\pm$ 4.7, 17-32                            |
| Local T1D (n=50)            | 18.7 $\pm$ 11.6, 4.8-49.6                        |
| Local AAb- (n=50)           | 16.4 $\pm$ 13.9, 0.05-48.1                       |
| Local AAb+ (n=50)           | 18.8 $\pm$ 14.9, 4.5-63.7                        |
| Entire Local Cohort (n=190) | 19.4 $\pm$ 11.8, 0.05-63.7                       |
| TrialNet Cohort (n=300)     | 11.0 $\pm$ 3.7, 1.0-18.0                         |

T1D, type 1 diabetes; AAb, autoantibody; –, negative; +, positive

**ESM Table 3. OGTT status at the time of miRNA testing for 21 Progressors and 74 non-Progressors, autoantibody-positive subjects.**

| <b>AGE<br/>(Years)</b> | <b>OGTT<br/>OUTCOME</b> |
|------------------------|-------------------------|
| <b>Non-Progressors</b> |                         |
| 11                     | diabetic range          |
| 13                     | dysglycemia             |
| 16                     | dysglycemia             |
| 14                     | dysglycemia             |
| 6                      | dysglycemia             |
| 8                      | dysglycemia             |
| 9                      | dysglycemia             |
| 12                     | dysglycemia             |
| 16                     | dysglycemia             |
| 8                      | dysglycemia             |
| 15                     | dysglycemia             |
| 10                     | dysglycemia             |
| 10                     | normal                  |
| 8                      | normal                  |
| 14                     | normal                  |
| 13                     | normal                  |
| 15                     | normal                  |
| 16                     | normal                  |
| 3                      | normal                  |
| 12                     | normal                  |
| 5                      | normal                  |
| 16                     | normal                  |
| 12                     | normal                  |
| 14                     | normal                  |
| 12                     | normal                  |
| 11                     | normal                  |
| 15                     | normal                  |
| 14                     | normal                  |
| 7                      | normal                  |
| 15                     | normal                  |
| 13                     | normal                  |
| 15                     | normal                  |
| 10                     | normal                  |
| 4                      | normal                  |
| 4                      | normal                  |

| <b>AGE<br/>(Years)</b> | <b>OGTT OUTCOME</b> | <b>TIME FROM<br/>OGTT to T1D<br/>(Months)</b> |
|------------------------|---------------------|-----------------------------------------------|
| <b>Progressors</b>     |                     |                                               |
| 11                     | diabetic range      | 0.0                                           |
| 12                     | diabetic range      | 0.0                                           |
| 14                     | diabetic range      | 0.0                                           |
| 7                      | diabetic range      | 0.0                                           |
| 15                     | diabetic range      | 0.0                                           |
| 9                      | diabetic range      | 0.1                                           |
| 13                     | diabetic range      | 0.1                                           |
| 9                      | diabetic range      | 0.4                                           |
| 9                      | diabetic range      | 2.1                                           |
| 16                     | diabetic range      | 9.3                                           |
| 18                     | dysglycemia         | 1.8                                           |
| 15                     | dysglycemia         | 2.6                                           |
| 7                      | dysglycemia         | 5.1                                           |
| 14                     | dysglycemia         | 5.9                                           |
| 13                     | dysglycemia         | 9.2                                           |
| 14                     | dysglycemia         | 11.0                                          |
| 7                      | dysglycemia         | 16.7                                          |
| 12                     | dysglycemia         | 25.7                                          |
| 17                     | dysglycemia         | 35.7                                          |
| 7                      | normal              | 2.2                                           |
| 7                      | normal              | 20.2                                          |



**ESM Table 3. OGTT status at the time of miRNA testing for 21 Progressors and 74 non-Progressors, autoantibody-positive subjects, continued.**

| <b>AGE<br/>(Years)</b> | <b>OGTT<br/>OUTCOME</b> |
|------------------------|-------------------------|
| <b>Non-Progressors</b> |                         |
| 16                     | normal                  |
| 6                      | normal                  |
| 8                      | normal                  |
| 12                     | normal                  |
| 18                     | normal                  |
| 4                      | normal                  |
| 13                     | normal                  |
| 9                      | normal                  |
| 9                      | normal                  |
| 16                     | normal                  |
| 17                     | normal                  |
| 15                     | normal                  |
| 10                     | normal                  |
| 5                      | normal                  |
| 9                      | normal                  |
| 8                      | normal                  |
| 14                     | normal                  |
| 8                      | normal                  |
| 9                      | normal                  |
| 15                     | normal                  |
| 6                      | normal                  |
| 11                     | normal                  |
| 11                     | normal                  |
| 15                     | normal                  |
| 9                      | normal                  |
| 8                      | normal                  |
| 9                      | normal                  |
| 4                      | normal                  |
| 13                     | normal                  |
| 4                      | normal                  |
| 14                     | normal                  |
| 10                     | normal                  |
| 8                      | normal                  |
| 12                     | normal                  |
| 13                     | normal                  |
| 16                     | normal                  |

| <b>AGE<br/>(Years)</b> | <b>OGTT OUTCOME</b> | <b>TIME FROM<br/>OGTT to T1D<br/>(Months)</b> |
|------------------------|---------------------|-----------------------------------------------|
| <b>Progressors</b>     |                     |                                               |

**ESM Table 3. OGTT status at the time of miRNA testing for 21 Progressors and 74 non-Progressors, autoantibody-positive subjects, continued.**

| <b>AGE<br/>(Years)</b> | <b>OGTT<br/>OUTCOME</b> |
|------------------------|-------------------------|
| <b>Non-Progressors</b> |                         |
| 14                     | normal                  |
| 10                     | normal                  |
| 9                      | normal                  |

| <b>AGE<br/>(Years)</b> | <b>OGTT OUTCOME</b> | <b>TIME FROM<br/>OGTT to T1D<br/>(Months)</b> |
|------------------------|---------------------|-----------------------------------------------|
| <b>Progressors</b>     |                     |                                               |

**ESM Table 4. Additional miRNAs showing correlations with OGTT outcomes.***P* values are noted as \**p*<0.05, \*\**p*<0.01, \*\*\**p*<0.001.

|             |    | Index60  | AUC<br>Glucose | 30-0 C-<br>peptide | AUC C-<br>peptide | Peak C-<br>peptide |
|-------------|----|----------|----------------|--------------------|-------------------|--------------------|
| miRNAs      | N  | <i>r</i> | <i>r</i>       | <i>r</i>           | <i>r</i>          | <i>r</i>           |
| miR-122-5p  | 94 | -0.159   | -0.033         | 0.154              | 0.204*            | 0.166              |
| miR-126-3p  | 94 | 0.207*   | 0.158          | -0.158             | -0.137            | -0.111             |
| miR-155-5p  | 50 | -0.247   | 0.000          | 0.377**            | 0.258             | 0.253              |
| miR-181a-5p | 96 | 0.220*   | 0.058          | -0.122             | -0.201*           | -0.168             |
| miR-222-3p  | 94 | 0.213*   | 0.027          | -0.177             | -0.212*           | -0.231*            |
| miR-23a-3p  | 96 | 0.194    | -0.003         | -0.179             | -0.205*           | -0.205*            |
| miR-27a-3p  | 96 | 0.221*   | 0.190          | -0.168             | -0.143            | -0.132             |
| miR-542-5p  | 73 | 0.035    | 0.259*         | -0.005             | 0.034             | 0.007              |
| miR-548a-3p | 84 | -0.295** | 0.084          | 0.128              | 0.281**           | 0.265*             |

# CONTROLS

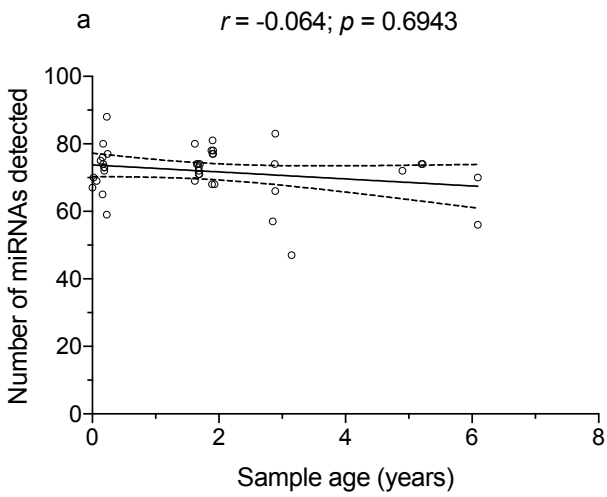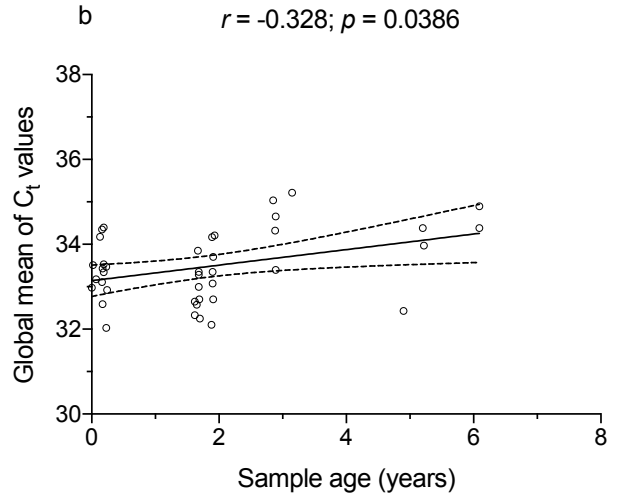

# TRIALNET

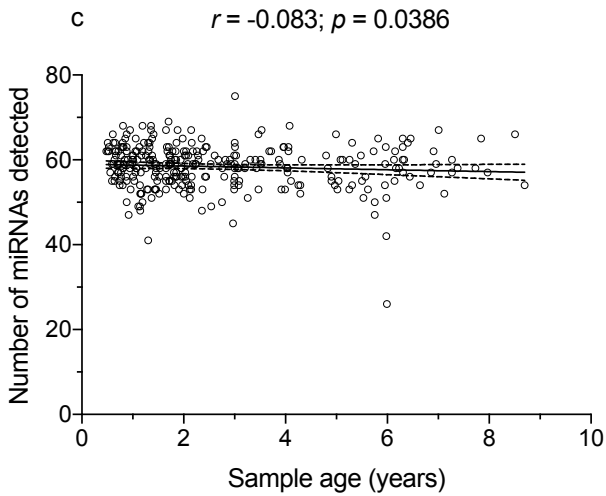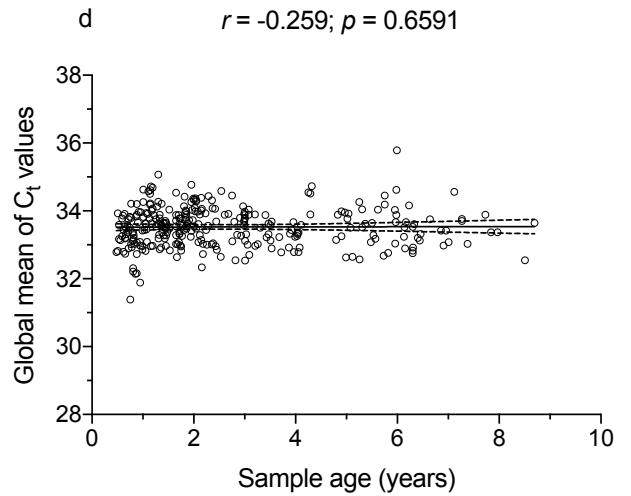

**ESM Fig. 1. Correlations of sample age with number of miRNAs detected and global mean of  $C_t$  values.**

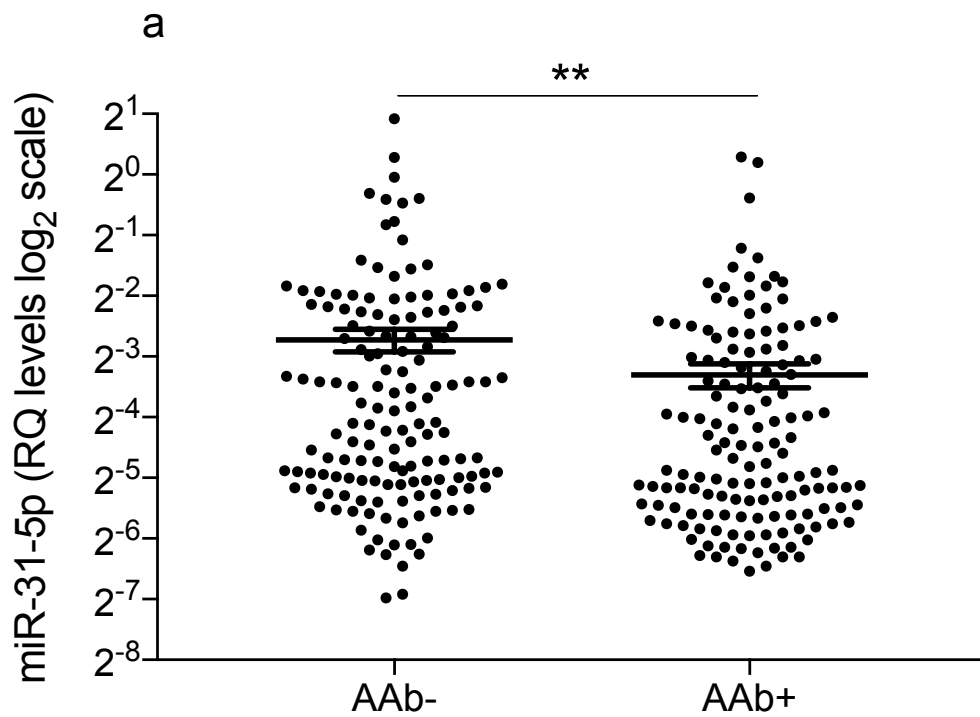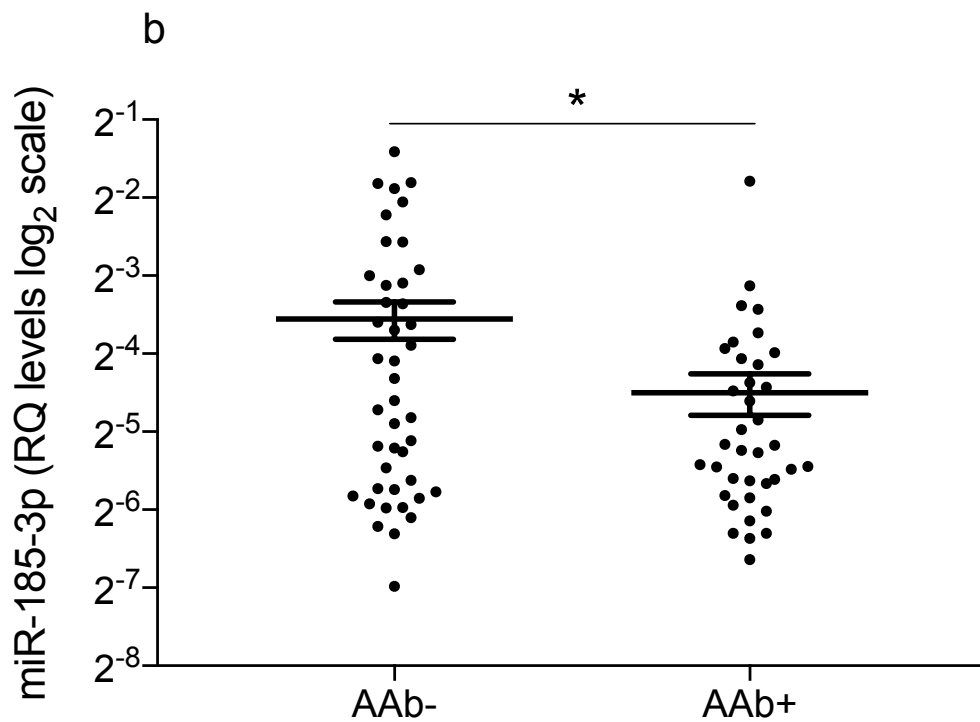

ESM Fig. 2. Levels of miR-31-5p and miR-185-3p in autoantibody-discordant sibling pairs. Significance is noted as \* $p < 0.05$ , \*\* $p < 0.01$ , \*\*\* $p < 0.001$ .

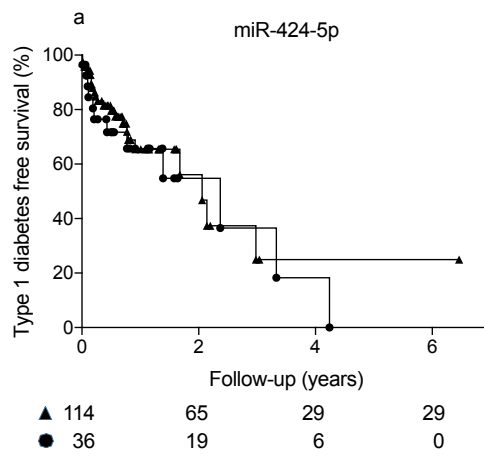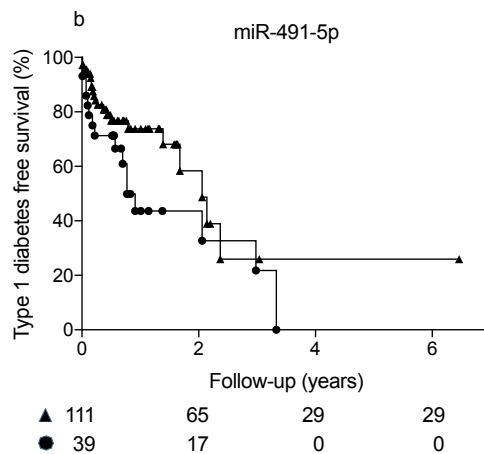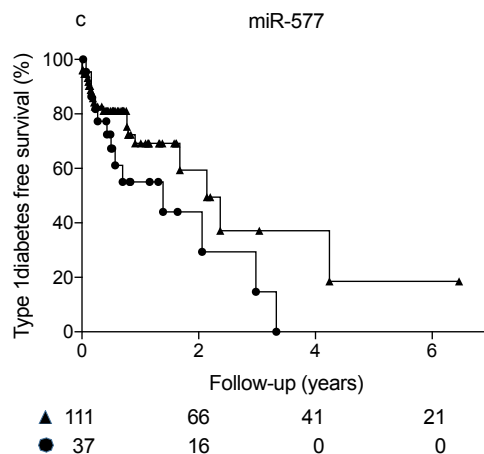

**ESM Fig. 3.;** Kaplan–Maier survival curves for the development of type 1 diabetes among autoantibody-positive participants based on ROC cut-off levels of miRNAs associated with disease progression. Circles indicate subjects with levels above the ROC cut-off, triangles identify subjects with levels below cut-off. Number of subjects at different time points for each group are shown below the X axis. No statistically significant differences were observed.

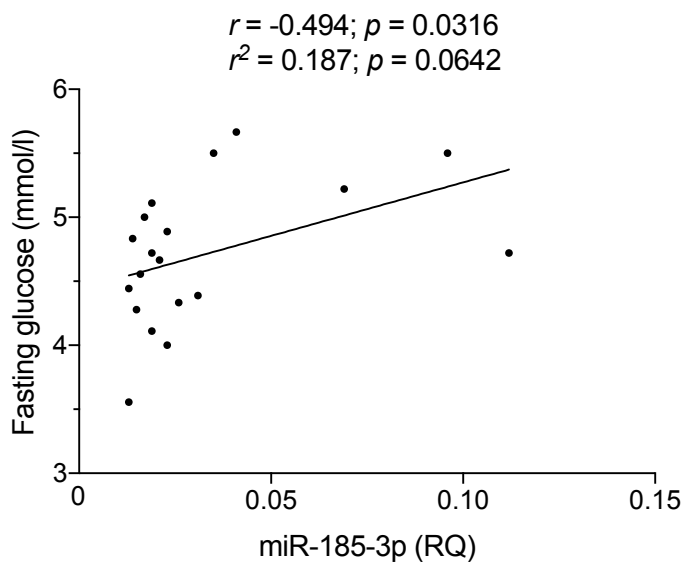

**ESM Fig. 4. Correlation of miR-185-5p levels with fasting glucose values in autoantibody-positive participants.**
